# Supplementary material
Source: MDPI journal article supplement (https://www.mdpi.com/2220-9964/11/4/229)
Supplement: s1 [file s1]

## Supplementary Materials

### 1. Variables and Data Source

**Table S1. Variables and data source**

| Variable                                 | Variable detail                                        | Time Frame                         | Original data source                                                                                                                                                                                                |
|------------------------------------------|--------------------------------------------------------|------------------------------------|---------------------------------------------------------------------------------------------------------------------------------------------------------------------------------------------------------------------|
| <b>Basic</b>                             |                                                        |                                    |                                                                                                                                                                                                                     |
| Total Confirmed Cases                    | The cumulative number of COVID-19 cases                | 21 January 2020 – 31 December 2020 | Johns Hopkins University Center for Systems Science and Engineering data repository.<br><a href="https://coronavirus.jhu.edu/map.html">https://coronavirus.jhu.edu/map.html</a>                                     |
| Total population                         | Population estimate                                    | 2018                               | 2014-2018 American Community Survey.<br><a href="https://svi.cdc.gov/data-and-tools-download.html">https://svi.cdc.gov/data-and-tools-download.html</a>                                                             |
| State area                               | Tract area in square miles.                            | 2018                               | United States (US) Census Cartographic Boundary File - U.S. Tracts 2018 at 1:500,000 resolution.<br><a href="https://svi.cdc.gov/data-and-tools-download.html">https://svi.cdc.gov/data-and-tools-download.html</a> |
| <b>County-Level</b>                      |                                                        |                                    |                                                                                                                                                                                                                     |
| Infection rate(I)                        | Cumulative number of confirmed cases per 10,000 people | 21 January 2020 – 31 December 2020 |                                                                                                                                                                                                                     |
| Overall Social Vulnerability Index (SVI) | Social Vulnerability Index                             | 2018                               | Centers for Disease Control and Prevention<br><a href="https://svi.cdc.gov/data-and-tools-download.html">https://svi.cdc.gov/data-and-tools-download.html</a>                                                       |
| Socioeconomic status index(SVI1)         | Sub-domain index of Social Vulnerability Index         | 2018                               | Centers for Disease Control and Prevention<br><a href="https://svi.cdc.gov/data-and-tools-download.html">https://svi.cdc.gov/data-and-tools-download.html</a>                                                       |
| Household                                | Sub-domain index of Social                             | 2018                               | Centers for Disease Control and Prevention                                                                                                                                                                          |

|                                                    |                                                                 |                               |                                                                                                                                                               |
|----------------------------------------------------|-----------------------------------------------------------------|-------------------------------|---------------------------------------------------------------------------------------------------------------------------------------------------------------|
| characteristics and disability index (SVI2)        | Vulnerability Index                                             |                               | <a href="https://svi.cdc.gov/data-and-tools-download.html">https://svi.cdc.gov/data-and-tools-download.html</a>                                               |
| Minority status and language index (SVI3)          | Sub-domain index of Social Vulnerability Index                  | 2018                          | Centers for Disease Control and Prevention<br><a href="https://svi.cdc.gov/data-and-tools-download.html">https://svi.cdc.gov/data-and-tools-download.html</a> |
| Housing type and transportation index (SVI4)       | Sub-domain index of Social Vulnerability Index                  | 2018                          | Centers for Disease Control and Prevention<br><a href="https://svi.cdc.gov/data-and-tools-download.html">https://svi.cdc.gov/data-and-tools-download.html</a> |
| <b>State-Level</b>                                 |                                                                 |                               |                                                                                                                                                               |
| School closure policy index (C1)                   | Record closings of schools and universities                     | 1 March 2020–31 December 2020 | Oxford Covid-19 Government Response Tracker<br><a href="https://github.com/OxCGRT/covid-policy-tracker">https://github.com/OxCGRT/covid-policy-tracker</a>    |
| Workplace closure policy index(C2)                 | Record closings of workplaces                                   | 1 March 2020–31 December 2020 | Oxford Covid-19 Government Response Tracker<br><a href="https://github.com/OxCGRT/covid-policy-tracker">https://github.com/OxCGRT/covid-policy-tracker</a>    |
| Public transport closure index(C3)                 | Record closing of public transport                              | 1 March 2020–31 December 2020 | Oxford Covid-19 Government Response Tracker<br><a href="https://github.com/OxCGRT/covid-policy-tracker">https://github.com/OxCGRT/covid-policy-tracker</a>    |
| Restrictions on internal movement policy index(C4) | Record restrictions on internal movement between cities/regions | 1 March 2020–31 December 2020 | Oxford Covid-19 Government Response Tracker<br><a href="https://github.com/OxCGRT/covid-policy-tracker">https://github.com/OxCGRT/covid-policy-tracker</a>    |

## 2. HLM and Full Results

### Level-1 Model

$$I_{ij} / M_{ij} = \beta_0j + \beta_1j*(SVI1ij) + \beta_2j*(SVI2ij) + \beta_3j*(SVI3ij) + \beta_4j*(SVI4ij) + r_{ij}$$

### Level-2 Model

$$\beta_0j = \gamma_{00} + \gamma_{01}*(C1j) + \gamma_{02}*(C2j) + \gamma_{03}*(C3j) + \gamma_{04}*(C4j) + u_{0j}$$

$$\beta_1j = \gamma_{10} + \gamma_{11}*(C1j) + \gamma_{12}*(C2j) + \gamma_{13}*(C3j) + \gamma_{14}*(C4j) + u_{1j}$$

$$\beta_2j = \gamma_{20} + \gamma_{21}*(C1j) + \gamma_{22}*(C2j) + \gamma_{23}*(C3j) + \gamma_{24}*(C4j) + u_{2j}$$

$$\beta_3j = \gamma_{30} + \gamma_{31}*(C1j) + \gamma_{32}*(C2j) + \gamma_{33}*(C3j) + \gamma_{34}*(C4j) + u_{3j}$$

$$\beta_4j = \gamma_{40} + \gamma_{41}*(C1j) + \gamma_{42}*(C2j) + \gamma_{43}*(C3j) + \gamma_{44}*(C4j) + u_{4j}$$

### Mixed Model

$$I_{ij} = \gamma_{00} + \gamma_{01}*C1j + \gamma_{02}*C2j + \gamma_{03}*C3j + \gamma_{04}*C4j + \gamma_{10}*SVI1ij + \gamma_{11}*C1j*SVI1ij + \gamma_{12}*C2j*SVI1ij + \gamma_{13}*C3j*SVI1ij + \gamma_{14}*C4j*SVI1ij + \gamma_{20}*SVI2ij + \gamma_{21}*C1j*SVI2ij + \gamma_{22}*C2j*SVI2ij + \gamma_{23}*C3j*SVI2ij + \gamma_{24}*C4j*SVI2ij + \gamma_{30}*SVI3ij + \gamma_{31}*C1j*SVI3ij + \gamma_{32}*C2j*SVI3ij + \gamma_{33}*C3j*SVI3ij + \gamma_{34}*C4j*SVI3ij + \gamma_{40}*SVI4ij + \gamma_{41}*C1j*SVI4ij + \gamma_{42}*C2j*SVI4ij + \gamma_{43}*C3j*SVI4ij + \gamma_{44}*C4j*SVI4ij + u_{0j} + u_{1j}*SVI1ij + u_{2j}*SVI2ij + u_{3j}*SVI3ij + u_{4j}*SVI4ij + r_{ij}$$

The abbreviations of all variables are referred to in Table 1.

**Table S2. Final estimation of fixed effects for COVID-19 infection rate**

| Fixed Effect                | Coefficient | Standard error | t-ratio      | Approx. d.f. | p-value |
|-----------------------------|-------------|----------------|--------------|--------------|---------|
| For INTRCPT1, $\gamma_{00}$ |             |                |              |              |         |
| INTRCPT2, $\gamma_{00}$     | -0.8757     | 0.104715       | -8.362698754 | 46           | <0.001  |
| C1, $\gamma_{01}$           | -0.296268   | 0.076103       | -3.892987136 | 46           | <0.001  |
| C2, $\gamma_{02}$           | -0.701596   | 0.111095       | -6.315279716 | 46           | <0.001  |
| C3, $\gamma_{03}$           | -0.226485   | 0.110359       | -2.052256726 | 46           | 0.023   |
| C4, $\gamma_{04}$           | -0.664316   | 0.112879       | -5.885204511 | 46           | <0.001  |
| For SVI1 slope, $\beta_1$   |             |                |              |              |         |
| INTRCPT2, $\gamma_{10}$     | 1.716044    | 0.156417       | 10.97095584  | 46           | <0.001  |
| C1, $\gamma_{11}$           | 0.008166    | 0.164279       | 0.049708119  | 46           | 0.287   |
| C2, $\gamma_{12}$           | 0.915024    | 0.197581       | 4.63113356   | 46           | <0.001  |
| C3, $\gamma_{13}$           | -0.103452   | 0.137526       | -0.752235941 | 46           | 0.081   |
| C4, $\gamma_{14}$           | -0.680492   | 0.149777       | -4.543367807 | 46           | <0.001  |
| For SVI2 slope, $\beta_2$   |             |                |              |              |         |
| INTRCPT2, $\gamma_{20}$     | -0.60522    | 0.095264       | -6.353081962 | 46           | <0.001  |
| C1, $\gamma_{21}$           | 0.132807    | 0.097779       | 1.358236431  | 46           | 0.053   |
| C2, $\gamma_{22}$           | -0.297438   | 0.135259       | -2.199025573 | 46           | 0.008   |

|                           |           |          |              |    |        |
|---------------------------|-----------|----------|--------------|----|--------|
| C3, $\gamma_{23}$         | -0.251744 | 0.078439 | -3.209423884 | 46 | <0.001 |
| C4, $\gamma_{24}$         | 0.26968   | 0.088039 | 3.063187905  | 46 | <0.001 |
| For SVI3 slope, $\beta_3$ |           |          |              |    |        |
| INTRCPT2, $\gamma_{30}$   | 3.162272  | 0.124247 | 25.45149581  | 46 | <0.001 |
| C1, $\gamma_{31}$         | 0.194877  | 0.123614 | 1.57649619   | 46 | 0.052  |
| C2, $\gamma_{32}$         | -0.091188 | 0.123587 | -0.737844595 | 46 | 0.087  |
| C3, $\gamma_{33}$         | -0.168267 | 0.115242 | -1.460118707 | 46 | 0.059  |
| C4, $\gamma_{34}$         | 0.40756   | 0.16138  | 2.52546784   | 46 | <0.001 |
| For SVI4 slope, $\beta_4$ |           |          |              |    |        |
| INTRCPT2, $\gamma_{40}$   | 1.4475    | 0.082305 | 17.58702387  | 46 | <0.001 |
| C1, $\gamma_{41}$         | -0.618696 | 0.108987 | -5.67678714  | 46 | <0.001 |
| C2, $\gamma_{42}$         | 0.488716  | 0.10917  | 4.476651095  | 46 | <0.001 |
| C3, $\gamma_{43}$         | -0.132444 | 0.070898 | -1.868092189 | 46 | 0.053  |
| C4, $\gamma_{44}$         | -0.049917 | 0.096406 | -0.517778976 | 46 | 0.086  |

Where  $p$ -value is the significance of influence, *Coefficient* is the regression coefficient of influence. On the premise of significant  $p$ -value results, the greater the regression coefficient, the greater the degree of influence. In Table 2, for example, for SVI1 slope, INTRCPT2 represents the influence of SVI1 on the COVID-19 infection rate. A significant correlation is shown by a  $p$  value < 0.001. Its regression coefficient value is 19.137. Among the four state-level variables, C2 and C4 had  $p$ -values < 0.001, indicating that state-level C2 and C4 had a significant moderation impact on the relationship between SVI1 and COVID-19 infection rate. The regression coefficients are 0.915 and -0.68, showing that C2 has a little greater influence than C4. The interpretation of other results is consistent with the above.
